# Supplementary material for: Potential of an Eco-Sustainable Probiotic-Cleaning Formulation in Reducing Infectivity of Enveloped Viruses
Source: MDPI journal article supplement (doi:10.3390/v13112227), 2021-11-04
Supplement: s1 [file s1]

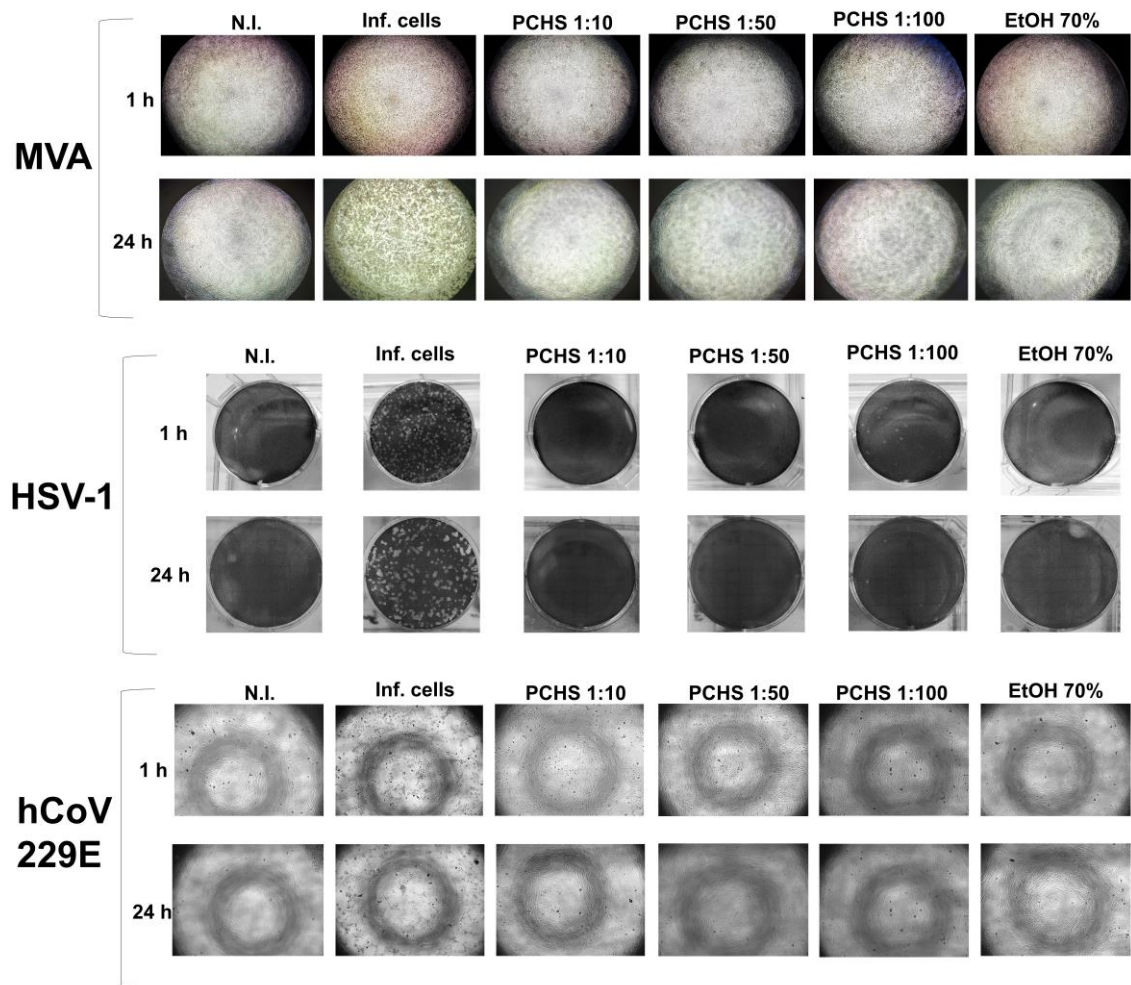

**Figure S1:** Representative pictures of the control and infected cells inoculated with the residual virus after 1 and 24 hours of contact with PCHS at the indicated dilutions.
